# Supplementary material
Source: Springer Nature journal article supplement (https://www.springermedizin.de/resource/supplementary/12891_2009_726_MOESM3_ESM.pdf/9506270)

# MMP-13

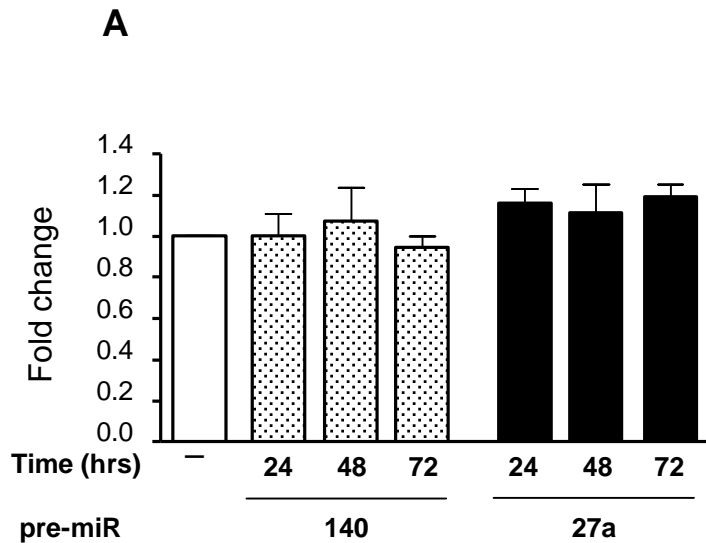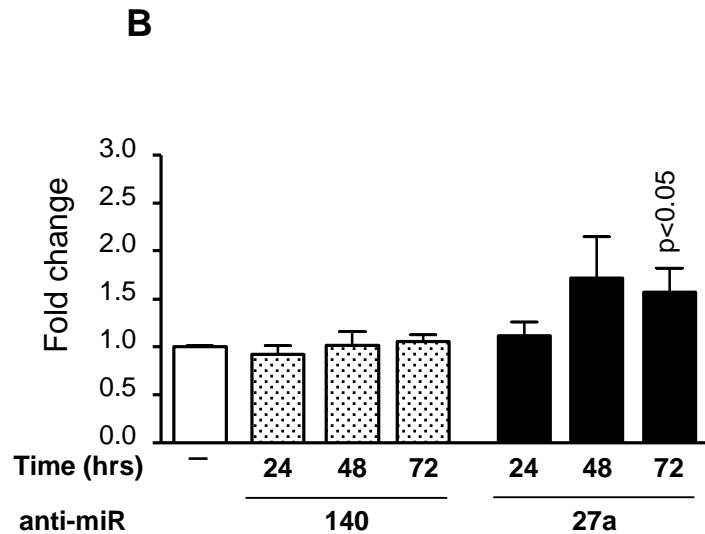

Supplement: MOESM3 [file 9506270]
